# Supplementary material for: Does urban living contribute to better nutrition? An ecological study on urban–rural disparities in Indonesia
Source: Research Square preprint supplement (doi:10.21203/rs.3.rs-7177814/v1), 2025-07-29
Supplement: Supplementary file 1 [file f02166ef83c4e9651032d254.xlsx]

## Sheet: Sheet1
Supplementary Table 1. Operational definitions of study variables as estimated in SSGI 2024
Variable Category	Indicator	Operational Definition
Nutritional Status (W/A)	Severely Underweight	Weight-for-age Z-score < –3 SD
Nutritional Status (W/A)	Underweight	Weight-for-age Z-score between –2 and –3 SD
Nutritional Status (W/A)	Normal	Weight-for-age Z-score between –2 and +2 SD
Nutritional Status (W/A)	At-Risk Overweight	Weight-for-age Z-score > +2 SD
Stunting Status (H/A)	Severely Stunted	Height-for-age Z-score < –3 SD
Stunting Status (H/A)	Stunted	Height-for-age Z-score between –2 and –3 SD
Stunting Status (H/A)	Normal	Height-for-age Z-score ≥ –2 SD
Wasting Status (W/H)	Severely Wasted	Weight-for-height Z-score < –3 SD
Wasting Status (W/H)	Wasted	Weight-for-height Z-score between –2 and –3 SD
Wasting Status (W/H)	Normal	Weight-for-height Z-score ≥ –2 SD
Wasting Status (W/H)	Overweight/Obese	Weight-for-height Z-score > +2 SD
Dietary Indicators	Minimum Dietary Diversity (MDD)	Consumption of ≥5 out of 8 food groups in the previous 24 hours
Dietary Indicators	Minimum Meal Frequency (MMFF)	Minimum recommended meal frequency met, adjusted for age and breastfeeding status
Dietary Indicators	Minimum Acceptable Diet (MAD)	Fulfilled both MDD and MMFF criteria
24-Hour Food Intake	Protein Intake	Any consumption of protein-rich food in previous 24 hours (yes/no)
24-Hour Food Intake	Sweet Beverage Intake	Consumption of sweetened beverages in previous 24 hours (yes/no)
24-Hour Food Intake	Unhealthy Food Intake	Consumption of fried snacks, instant noodles, or other processed food in previous 24 hours (yes/no)
24-Hour Food Intake	Vegetable Intake	Any vegetable consumption in previous 24 hours (yes/no)
Growth Monitoring	Standard Monitoring	Child received anthropometric measurement during health service visits (yes/no)
Maternal Health Service Use	Basic ANC Coverage	≥1 ANC visit with a skilled provider
Maternal Health Service Use	First-Trimester ANC	ANC initiated within first trimester
Maternal Health Service Use	Adequate ANC	≥4 ANC visits, appropriately spaced
Maternal Health Service Use	Comprehensive ANC	≥6 ANC visits across trimesters including ≥2 visits with a medical doctor and at least one ultrasound
